# Supplementary material
Source: PubMed Central journal article supplement (PMC2907901)
Supplement: NIHMS216861-supplement-figures_NMR_data.pdf [file NIHMS216861-supplement-figures_NMR_data.pdf]

## Supplemental Data

### Structural and Molecular Evolutionary Analysis

#### of Agouti and Agouti-Related Proteins

Pilgrim J. Jackson, Nick R. Douglas, Biaoxin Chai, Jonathan Binkley, Arend Sidow, Gregory S. Barsh, and Glenn L. Millhauser

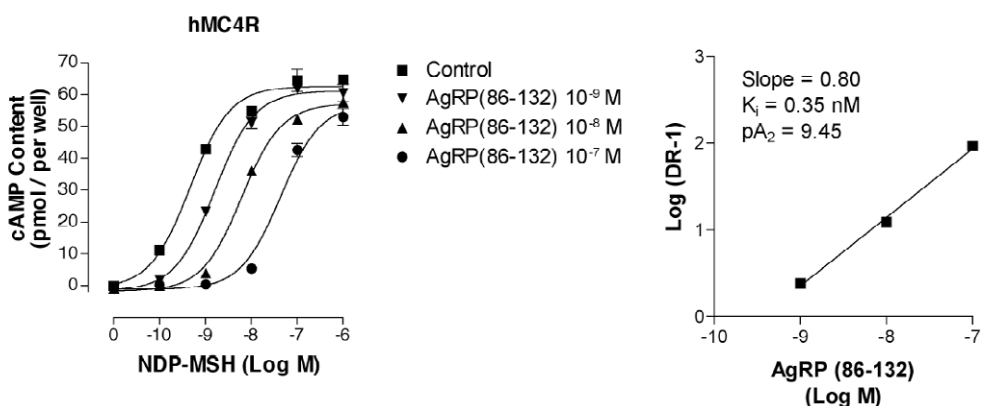

**Figure S1.** Inhibition of NDP-MSH stimulated cAMP generation at hMC4R by C-terminal AgRP, and corresponding Schild analysis, reveals competitive antagonism with a dissociation constant ( $K_i$ ) of 0.35 nM.

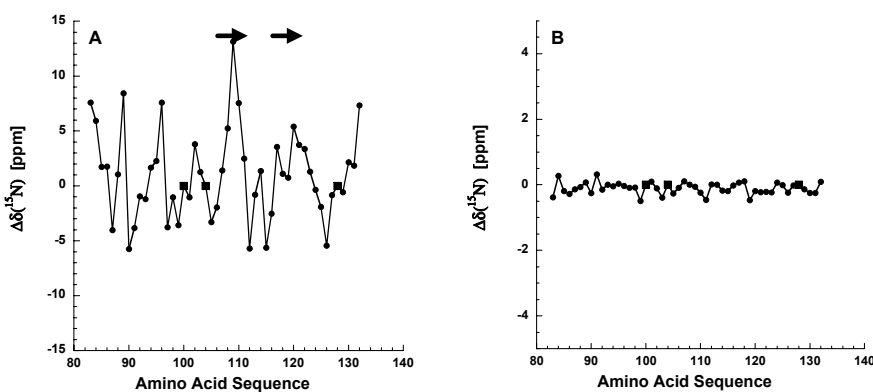

**Figure S2** Analysis of AgRP(83-132)  $^{15}\text{N}$  chemical shifts derived from the HSQC spectra of both the full-length protein and the isolated C-terminal domain. Panel A are the measured  $^{15}\text{N}$  chemical shifts from AgRP(83-132), minus the consensus random coil

chemical shifts. The significant variation is consistent with a folded domain. Circles represent measured values; squares represent proline, which are not observable in the HSQC spectra. The arrows show the locations of  $\beta$ -strands adjacent to the RFF triplet (residues 111 - 113). Panel B shows the difference in chemical shifts, full-length minus C-terminal, for residues 83 - 132. Note that the vertical axis is expanded by a factor of three compared to panel A. The limited scatter is consistent with that observed for the  $^1\text{H}$  chemical shifts, and demonstrates that the HSQC from residues 83 - 132 in full-length AgRP is essentially equivalent to the isolated C-terminal domain, AgRP(83-132).

**Table S1. Retention Times for full-length AgRP and its derivatives**

Column type: C18 vydac 4.6mm  
 Gradient: 25% acetonitrile-45% acetonitrile in 40min  
 Full-length AgRP, reduced: 28 minutes  
 Full-length AgRP, oxidized: 24 minutes  
 AgRP(83-132), oxidized: 14 minutes

**Table S2. Backbone NOEs observed in the C-terminal domain of full-length AgRP**

C94 NH -- Y118 HA  
 T107 NH -- R120 NH  
 Y109 NH -- Y118 NH  
 A106 NH -- C105NH  
 A106 NH -- P104 HA

**Table S3. Backbone  $^{15}\text{N}$  Chemical Shifts Determined from the HSQC Spectra**

|        |        |
|--------|--------|
| Ser83N | 123.11 |
| Ser84N | 121.43 |
| Arg85N | 122.94 |
| Arg86N | 122.97 |
| Cys87N | 114.67 |
| Val88N | 120.35 |
| Arg89N | 129.63 |
| Leu90N | 116.66 |
| His91N | 114.26 |
| Glu92N | 119.26 |
| Ser93N | 114.31 |
| Cys94N | 120.37 |
| Leu95N | 124.69 |
| Gly96N | 115.09 |
| Gln97N | 116.73 |
| Gln98N | 119.47 |

|         |        |
|---------|--------|
| Val99N  | 115.71 |
| Pro100  | NA     |
| Cys101N | 117.65 |
| Cys102N | 122.52 |
| Asp103N | 120.37 |
| Pro104  | NA     |
| Cys105N | 115.39 |
| Ala106N | 123.05 |
| Thr107N | 113.42 |
| Cys108N | 123.96 |
| Tyr109N | 134.06 |
| Cys110N | 126.25 |
| Arg111N | 123.68 |
| Phe112N | 115.00 |
| Phe113N | 119.89 |
| Asn114N | 120.37 |
| Ala115N | 119.36 |
| Phe116N | 118.18 |
| Cys117N | 122.25 |
| Tyr118N | 122.00 |
| Cys119N | 119.46 |
| Arg120N | 126.60 |
| Lys121N | 125.33 |
| Leu122N | 125.75 |
| Gly123N | 108.78 |
| Thr124N | 111.64 |
| Ala125N | 123.08 |
| Met126N | 114.85 |
| Asn127N | 118.18 |
| Pro128  | NA     |
| Cys129N | 118.14 |
| Ser130N | 117.66 |
| Arg131N | 123.05 |
| Thr132N | 119.33 |
